# Supplementary material for: Using specularity content to evaluate five geothermal heat flux maps of Totten Glacier
Source: Copernicus journal article supplement (doi:10.5194/tc-2023-58), 2023-05-22
Supplement: Supplementary file [file tc-2023-58-RC2-supplement.pdf]

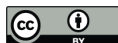

1           **Using specularity content to evaluate five geothermal heat flux maps of**  
2           **Totten Glacier**

3           Yan Huang<sup>1</sup>, Liyun Zhao<sup>1,2\*</sup>, Yiliang Ma<sup>1</sup>, Michael Wolovick<sup>3</sup>, John C. Moore<sup>1,4\*</sup>

4           <sup>1</sup> College of Global Change and Earth System Science, Beijing Normal University,  
5           Beijing 100875, China

6           <sup>2</sup> State Key Laboratory of Earth Surface Processes and Resource Ecology, Beijing  
7           Normal University, Beijing 100875, China

8           <sup>3</sup> Glaciology Section, Alfred-Wegener-Institut Helmholtz-Zentrum für Polar- und  
9           Meeresforschung, Bremerhaven, Germany

10          <sup>4</sup> Arctic Centre, University of Lapland, Rovaniemi, Finland

11          \* Corresponding author

12          Corresponding author: Liyun Zhao (zhaoliyun@bnu.edu.cn); John C. Moore  
13          (john.moore.bnu@gmail.com)

14

15

**Abstract**

16 Geothermal heat flux (GHF) is an important factor affecting the basal thermal  
17 environment of an ice sheet and crucial for its dynamics. But it is notoriously poorly  
18 defined for the Antarctic ice sheet. We compare basal thermal state of the Totten Glacier  
19 catchment as simulated by five different GHF datasets. We use a basal energy and water  
20 flow model coupled with a 3D full-Stokes ice dynamics model to estimate the basal  
21 temperature, basal friction heat and basal melting rate. In addition to the location of  
22 subglacial lakes, we use specularity content of the airborne radar returns as a two-sided  
23 constraint to discriminate between local wet or dry basal conditions and compare them  
24 with the basal state simulations with different GHF. Two medium magnitude GHF  
25 distribution maps derived from seismic modelling rank best at simulating both cold and  
26 warm bed regions well, the GHFs from Shen et al. (2020), and from Shapiro and  
27 Ritzwoller (2004). The best-fit simulated result shows that most of the inland bed area  
28 is frozen. Only the central inland subglacial canyon, co-located with high specularity  
29 content, reaches pressure-melting point consistently in all the five GHFs. Modelled  
30 basal melting rates there are generally 0-5 mm yr<sup>-1</sup> but with local maxima of 10 mm yr<sup>-1</sup>  
31 <sup>1</sup>. The fast-flowing grounded glaciers close to Totten ice shelf are lubricating their bases  
32 with melt water at rates of 10-400 mm yr<sup>-1</sup>.

33

34 **1 Introduction**

35 Totten Glacier is the primary outlet glacier of the Aurora Subglacial Basin (ASB) and  
36 one of the most vulnerable glaciers to a warming climate in East Antarctica (Dow et al.,  
37 2020). It holds an ice volume equivalent to 3.9 meters of global sea level (Morlighem  
38 et al., 2020; Greenbaum et al., 2015). Most of the bedrock below Totten Glacier is  
39 below sea level. Totten Ice Shelf has a relatively high basal melt rate of ~10 m yr<sup>-1</sup>  
40 compared with other ice shelves in East Antarctica (Rignot et al., 2013, Roberts et al.,  
41 2018) and has thinned and lost mass rapidly in recent years (Pritchard et al., 2009;  
42 Adusumilli et al., 2020).



43  
44 The ASB has a widespread distributed hydrological network with almost 200 ‘lake-like’  
45 or water accumulation features. There may be a hydrological flow pathway operating  
46 from subglacial lakes near the Dome C ice divide and the coast via the Totten Glacier  
47 (Wright et al., 2012), potentially affecting the stability of the Totten Glacier.  
48  
49 Basal melting ~~may~~ contribute to subglacial hydrological flow. Basal meltwater  
50 lubricates the flow of ice, which can impact the stability of the ice sheet and the  
51 direction of the ice flow (Livingstone et al., 2016; Bell et al., 2007). The basal meltwater  
52 moves down the pressure gradient and gradually develops into a complex subglacial  
53 hydrological system, which eventually flows into the ocean (Fricker et al., 2016).  
54 However, the spatial structure of the basal thermal state and basal melting rates beneath  
55 the Totten Glacier are not yet well understood.  
56  
57 Basal melting can occur where the ice temperature reaches the pressure melting point,  
58 dramatically lowering the basal friction and allowing the ice to flow faster. Geothermal  
59 heat flux (GHF) is an important boundary condition for ice temperature. Its magnitude  
60 and distribution affect the distribution of basal ice temperature and thus ice flow. The  
61 magnitude of GHF depends on the spatially varying geological conditions that control  
62 heat generation and conduction, including heat flux from the mantle, crustal thickness,  
63 heat production in the crust by radioactive decay, groundwater flow, and tectonic history  
64 (Pollack et al., 1993; Pittard et al., 2016). It is difficult to measure GHF directly due to  
65 limited access to Antarctic bedrock, with only a few point measurements in ice-free  
66 areas or from boreholes through the ice (Fisher et al., 2015). GHF datasets are  
67 commonly estimated from models relying on either seismic (Shapiro and Ritzwoller,  
68 2004; An et al., 2015; Shen et al., 2020), airborne magnetic data (Martos et al., 2017),  
69 or satellite geomagnetic data (Fox-Maule et al., 2005; Purucker et al., 2013).  
70  
71 Previous thermomechanical simulations of Totten Glacier (Dow et al., 2020; Pattyn et  
72 al., 2010; Pittard et al., 2016; ~~Van Liefferringe~~ et al., 2018) have used GHF data from  
73 Shapiro and Ritzwoller (2004), Purucker et al. (2013) and An et al. (2015), but Wright  
74 et al. (2012) used spatially uniform values. In this study, we simulated the basal thermal  
75 state of Totten Glacier, based on the best available topographic data and five different  
76 GHFs, including three GHF listed above, plus more recent GHF fields from Martos et  
77 al. (2017) and Shen et al. (2020).  
78  
79 We apply an off-line coupling between a basal energy and water flow model and a 3D  
80 full-Stokes ice flow model for each of the 5 GHF maps, to provide the best-fit  
81 distribution of modelled basal temperature and basal melt rate. We evaluate the  
82 simulated basal temperature fields under the different GHF maps using the observations  
83 of water at the ice base to infer which GHF map is most reliable in the ASB. The  
84 observations include a set of subglacial lakes locations and the specular content (Dow  
85 et al., 2020) calculated from airborne radar data collected by the International  
86 Collaborative Exploration of the Cryosphere by Airborne Profiling (ICECAP) survey.



87 Specularity is a parameterization of the along-track radar bed reflection scattering  
88 function that has been used to provide an attenuation-independent proxy for distributed  
89 subglacial water bodies (Schroeder et al., 2013). We devise measures of specularity that  
90 help discriminate between alternative GHF maps to best characterize both cold and  
91 warm beds.

92

## 93 **2 Regional Domain and Datasets**

94 Our modeled domain, the Totten Glacier, is located in the Aurora Subglacial Basin in  
95 East Antarctica (Fig. 1). Its boundary is based on drainage-basin boundaries defined  
96 from satellite ice sheet surface elevation and velocities (Mouginot et al., 2017). The  
97 surface elevation, bedrock elevation, and ice thickness are from MEaSURES  
98 BedMachine Antarctica, version 2 with a resolution of 500 m (Morlighem et al., 2020).

99

100 Simulation input and comparison datasets are shown in Table 1. The surface ice velocity  
101 data are obtained from MEaSURES Phase-Based Antarctica Ice Velocity Map, Version  
102 2 with resolution of 450 m (Rignot et al., 2017), which were mainly collected during  
103 the International Polar Years from 2007 to 2009 with additional surveys between 2013  
104 and 2016. Ice sheet surface temperature is prescribed by ALBMAP v1 with a resolution  
105 of 5 km (Le Brocq et al., 2010) and comes from monthly estimates inferred from  
106 AVHRR data averaged over 1982-2004 (Comiso, 2000). Subglacial lake locations are  
107 from the fourth inventory of Antarctic subglacial lakes (Wright and Siegert, 2012) and  
108 the first global inventory of subglacial lakes (Livingstone et al., 2022).

109

110 Five GHF datasets (Fig. 2; Table 2) are used in this study. All the datasets are  
111 interpolated into 2.0 km resolution. The specularity content data are from Dow et al  
112 (2020), where they calculated radar specularity content over ASB from the ICECAP  
113 survey lines, and smoothed the data with a 1 km filter, following the equations described  
114 in Schroeder et al. (2015). Specularity content is given as a relative value between 0  
115 and 1, larger values mean a higher likelihood of ~~the presence of water~~, and value of 0.4  
116 is taken as the division where specularity content shows the presence of water (Young  
117 et al., 2016).

118

119 **Table 1 Datasets used in simulations.**

| Variable name                                           | Dataset                                                            | Resolution       | Reference                                |
|---------------------------------------------------------|--------------------------------------------------------------------|------------------|------------------------------------------|
| surface elevation, bedrock elevation, and ice thickness | MEaSURES BedMachine Antarctica version 2                           | 500 m            | Morlighem et al., 2020; Cui et al., 2020 |
| surface ice velocity                                    | MEaSURES InSAR-based Antarctic ice velocity Map, version 2         | 450 m            | Rignot et al., 2017                      |
| surface temperature                                     | ALBMAP v1                                                          | 5 km             | Le Brocq et al., 2010                    |
| subglacial lake location                                | The first global inventory of subglacial lakes                     | -----            | Livingstone et al., 2022                 |
| specularity content                                     | Aurora Subglacial Basin GlADs inputs, outputs and geophysical data | 1 km along track | Dow et al., 2019                         |



120

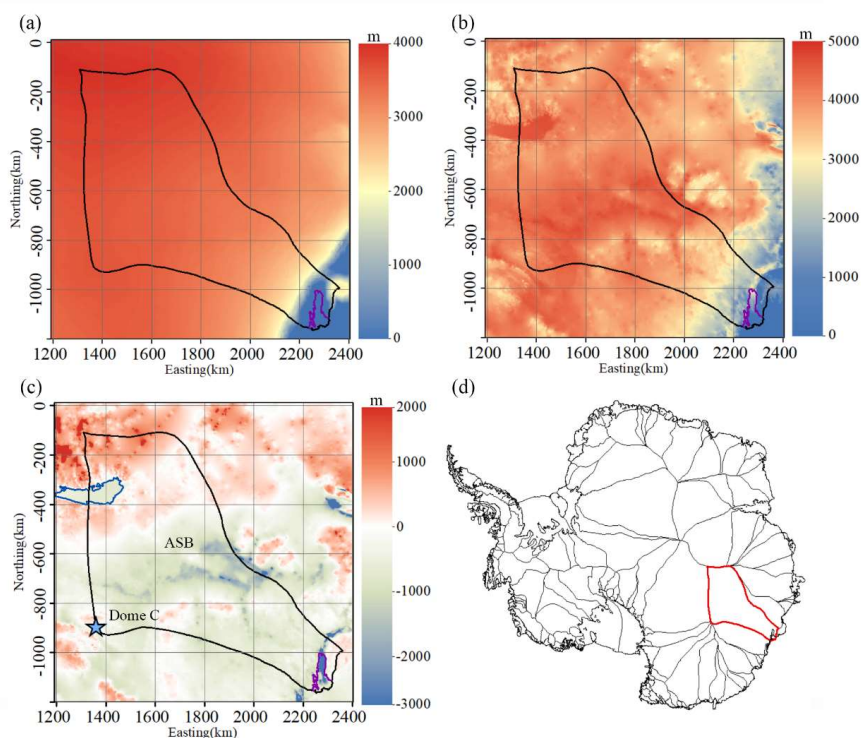

121

122 Fig. 1. The domain topography and location with domain boundary overlain. (a) surface elevation;  
 123 (b) ice thickness; (c) bed elevation; (d) the location of our domain in Antarctica. The solid black  
 124 curve is the outline of the study domain, including the Totten ice shelf. The purple curve in (a-c) is  
 125 the grounding line of Totten glacier. The blue curve in (c) is Lake Vostok (Studinger et al., 2003).  
 126 The solid red curve in (d) is the boundary of Totten Glacier. ASB and Dome C (blue star) are marked  
 127 in (c).  
 128

129 Table 2 The five GHF datasets used with the mean and range in our region.

| GHF map  | Reference                       | Method                        | Mean ( $\text{mW m}^{-2}$ ) | Range ( $\text{mW m}^{-2}$ ) |
|----------|---------------------------------|-------------------------------|-----------------------------|------------------------------|
| Martos   | Martos et al., 2017             | airborne<br>geomagnetic data  | 65                          | 51-70                        |
| Shen     | Shen et al., 2020               | seismic model                 | 58                          | 42-63                        |
| An       | An et al., 2015                 | seismic model                 | 51                          | 34-56                        |
| Shapiro  | Shapiro and Ritzwoller,<br>2004 | seismic model                 | 58                          | 44-63                        |
| Purucker | Purucker, 2013                  | Satellite geomagnetic<br>data | 51                          | 37-67                        |

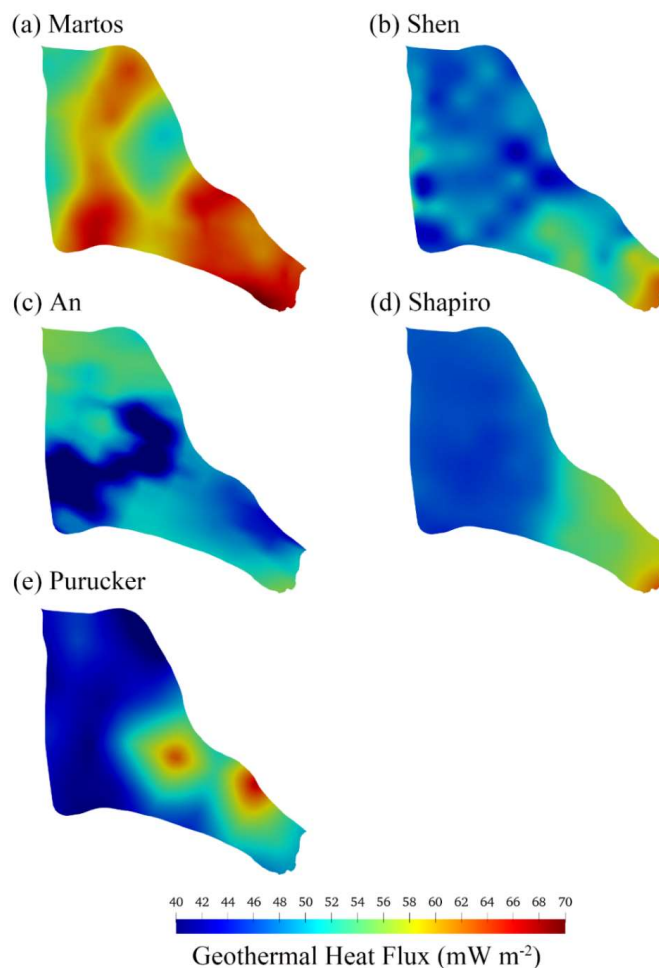

130

131 [Fig. 2.](#) The spatial distribution of GHF over our domain as described in Fig. 1. See Table 2 for the  
132 GHF map details.

133

### 134 **3 Model**

135 Our goal is to map the basal thermal state of Totten glacier, including basal temperature  
136 and basal melting rate. GHF, basal frictional heat and englacial heat conduction are the  
137 main factors that determine the basal thermal state of the ice sheet. We need to simulate  
138 the ice flow velocity and stress to calculate the basal frictional heat, and to simulate the  
139 ice temperature to calculate the englacial heat conduction flux.

140

141 Following the same method as Kang et al. (2022), we solve an inverse problem by a  
142 full-Stokes model, implemented in Elmer/Ice, to infer the basal friction coefficient such  
143 that the modelled velocity best fits observations. To get a proper vertical ice temperature  
144 profile subject to thermal boundary conditions needed in solving the inverse problem,



145 we use a forward model that consists of an improved Shallow Ice Approximation (SIA)  
146 thermomechanical model with a subglacial hydrology model (Wolovick et al., 2021a).  
147 We do steady state simulations by coupling the forward and inverse models.

148

### 149 3.1 Mesh Generation and Refinement

150 We use GMSH (Geuzaine and Remacle, 2009) to generate an initial 2-D horizontal  
151 footprint mesh. Then we refine the mesh by an anisotropic mesh adaptation code in the  
152 Mmg library (<http://www.mmgtools.org/>). The resulting mesh is shown in Fig. 3 and  
153 has minimum and maximum element sizes of about 800 m and 20 km. The range of  
154 mesh size is 800 m at ice shelf, 1-3 km upstream near the grounding line, and 6-20 km  
155 over most of the inland ice. The 2-D mesh is then vertically extruded using 10 equally  
156 spaced, terrain following layers.

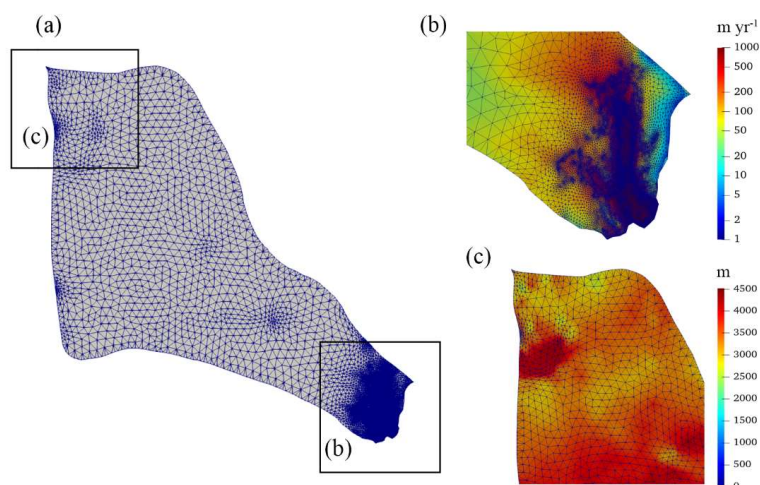

157

158 Fig. 3. The refined 2-D horizontal domain footprint mesh (a). Boxes outlined in (a) are shown in  
159 detail overlain with surface ice velocity in (b) and with ice thickness in (c).

160

### 161 3.2 Boundary Conditions

162 The ice surface is assumed to be stress-free. At the ice front, the normal stress under the  
163 sea surface is equal to the hydrostatic water pressure. On the lateral boundary, the  
164 normal stress is equal to the ice pressure applied by neighboring glaciers and the normal  
165 velocity is assumed to be 0. The bed for grounded ice is assumed to be rigid,  
166 impenetrable, and fixed over time. For simplicity, we ignore the existence of Lake  
167 Vostok and replace the lake with bedrock. We do this to avoid having to implement a  
168 spatially variable sea level in our model, as the level of hydrostatic equilibrium in Lake  
169 Vostok is several thousand meters higher than in the ocean. Our inverted drag  
170 coefficient over the lake is very low, indicating that our simplification has only a small  
171 influence on ice flow. However, our basal melt rates over the lake are probably  
172 inaccurate, as we assume that geothermal flux from the lake bottom is applied directly



173 to the ice base, without accounting for circulation within the lake.  
174 A linear sliding law is used to describe the relationship between the basal sliding  
175 velocity and the basal shear force, on the bottom of grounded ice,

$$\tau_b = C \cdot u_b, \quad (1)$$

176 To avoid non-physical negative values,  $C = 10^\beta$  is used in the simulation. We call  $\beta$   
177 the basal friction coefficient.  $C$  is initialized to a constant value of  $10^{-4}$  MPa m<sup>-1</sup> yr  
178 (Gillet-Chaulet et al., 2012), and then replaced with the inverted  $C$  in subsequent  
179 inversion steps.

180  
181 We relax the free surface of the domain by a short transient run to reduce the non-  
182 physical spikes in initial surface geometry (Zhao et al., 2018). The transient simulation  
183 period here is 0.5 yr with a timestep of 0.01 yr.

184  
185 Following the same method as Kang et al. (2022), we improve the parameterization of  
186  $\beta$  via  $C$  in Eq 5 (Section 3.2.2) by considering basal temperature  $T_{bed}$ ,

$$\beta_{new} = \beta_{old} + \alpha(T_m - T_{bed}), \quad (2)$$

187 where  $\beta_{old}$  is from the inverse model,  $\alpha$  is a positive factor to be tuned,  $T_m$  is pressure  
188 melting temperature. We take  $\alpha$  to be 1, and use the parameterization of  $\beta_{new}$  in Eq 1  
189 in all the simulations (Kang et al., 2022). Using Eq 2 does not change simulated surface  
190 velocities in the interior region.

191

### 192 3.3 Basal Melt Rate

193 Based on the inverted basal velocity and basal shear stress, we can calculate the basal  
194 friction heat. We then produce the basal melt rate using the thermal equilibrium as  
195 follows (Greve and Blatter, 2009):

$$M = \frac{G + \vec{u}_b \vec{\tau}_b + k(T) \frac{dT}{dz}}{\rho_i L}, \quad (3)$$

196 where  $M$  is the basal melt rate,  $G$  is GHF,  $\vec{u}_b \vec{\tau}_b$  is the basal friction heat,  $-k(T) \frac{dT}{dz}$  is the  
197 upward heat conduction,  $\rho_i$  is the ice density, and  $L$  is latent heat of ice melt. GHF and  
198 frictional heating from basal slip warm the base, while the upward heat conduction to  
199 the interior cools the base.

## 200 4 Simulation Results

### 201 4.1 Ice Velocity

202 The modeled surface velocity fields with different GHFs are all very close to the  
203 observed as expected by design of the minimization of misfit between the modeled and  
204 the observed surface velocity in the inverse model. Therefore, we show only the Martos  
205 et al. (2017) result as a representative example of all simulated velocity fields (Fig. 4).



206 The surface speed can reach as high as about  $1000 \text{ m yr}^{-1}$  on the ice shelf (Fig. 4a, b).  
207  
208 Fig. 4c shows the modeled basal ice velocity. The modeled basal ice velocity is close to  
209 0 in most of the inland region. The fast basal velocity in the middle of the region (Fig.  
210 4c) is associated with subglacial canyon features (Fig. 1c), high basal temperature (Fig.  
211 5) and small friction coefficient. In the grounded fast flow region, the basal ice velocity  
212 can reach a maximum of  $500 \text{ m yr}^{-1}$ .

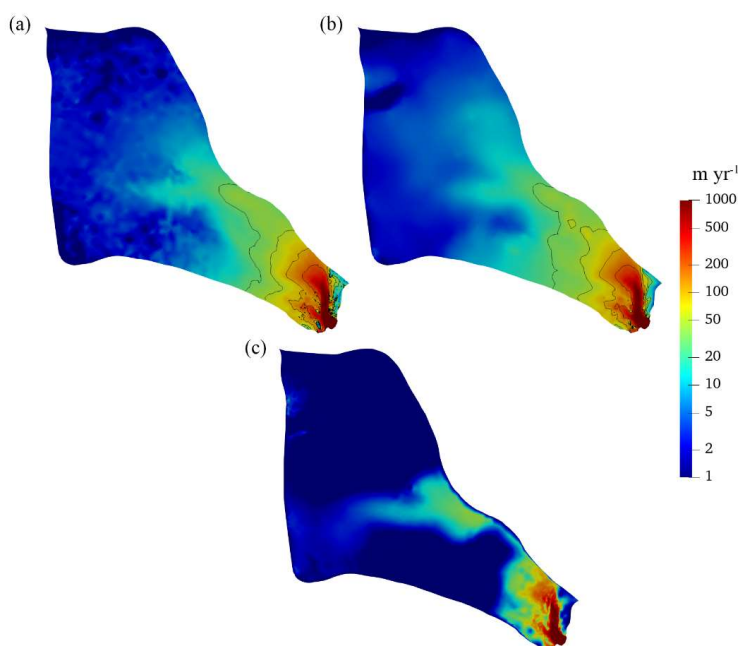

213  
214 Fig. 4. (a) Observed surface velocity, (b) modeled surface velocity, (c) modeled basal velocity in the  
215 experiment using the Martos et al. (2017) GHF. The black solid lines in (a) and (b) represent speed  
216 contours of 30, 50, 100 and  $200 \text{ m yr}^{-1}$ .  
217

#### 218 4.2 Basal Ice Temperature, Basal Friction Heat and Heat Conduction

219 Fig. 5 shows the modelled basal temperatures from the five experiments. In the fast-  
220 flowing region (defined as having surface speeds higher than  $30 \text{ m yr}^{-1}$ ), the modelled  
221 ice basal temperatures are all at the pressure melting point (“warm”). However, in the  
222 slow-flowing region, the modeled ice basal temperature shows large difference between  
223 GHF fields. In the experiment using the Martos et al. (2017) GHF (Fig. 5a), which has  
224 the highest GHF over the domain, we get the largest area of warm base extending to all  
225 but the inland southeast corner. The experiment using Shen et al. (2020) GHF (Fig. 5b),  
226 which has the second highest GHF, yields the second largest area of warm base. The  
227 experiment using Purucker et al. (2013) GHF (Fig. 5e), with the lowest GHF has the  
228 smallest warm base area, which is mostly confined to the fast-flowing region. All  
229 experiments show cold basal temperatures in the southwest corner which is associated  
230 with relatively thin ice above subglacial mountains (Fig. 1c).



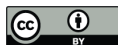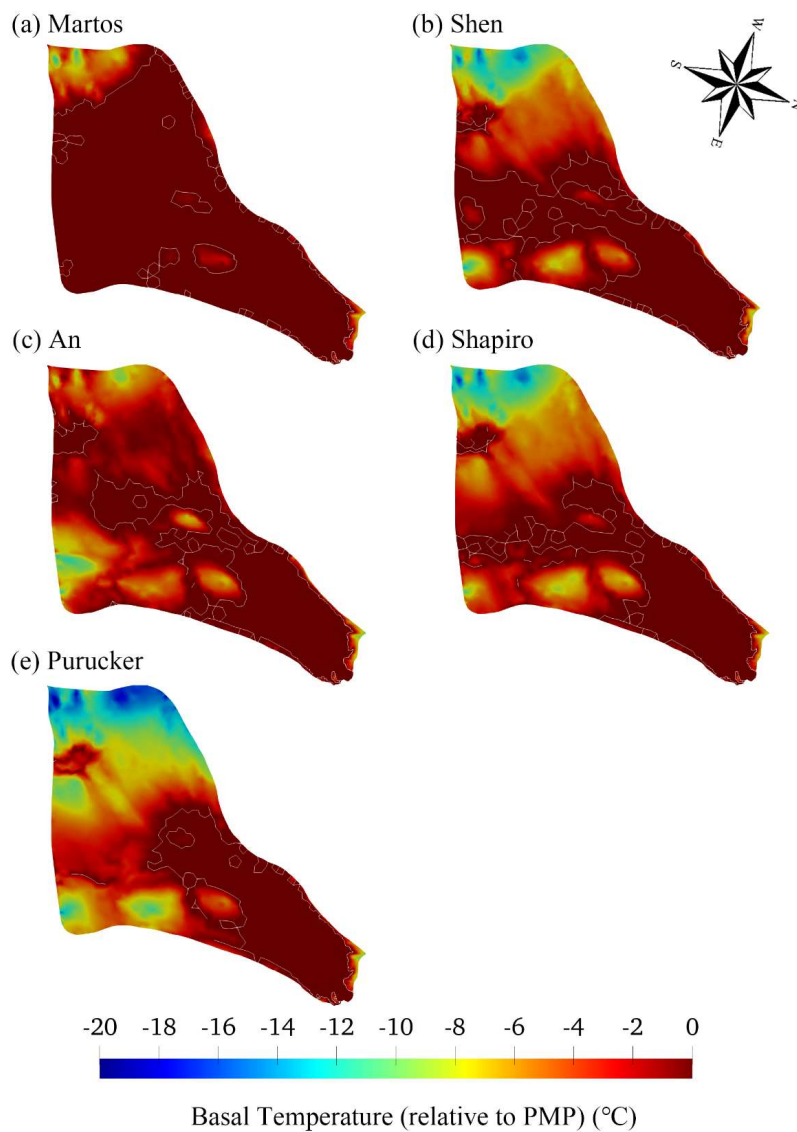

231

232 Fig. 5. Modelled basal temperature relative to pressure melting point, (a) to (e) corresponding to the

233 GHF (a) to (e) in Fig. 2. The ice bottom at the pressure-melting point is delineated by a white contour.

234

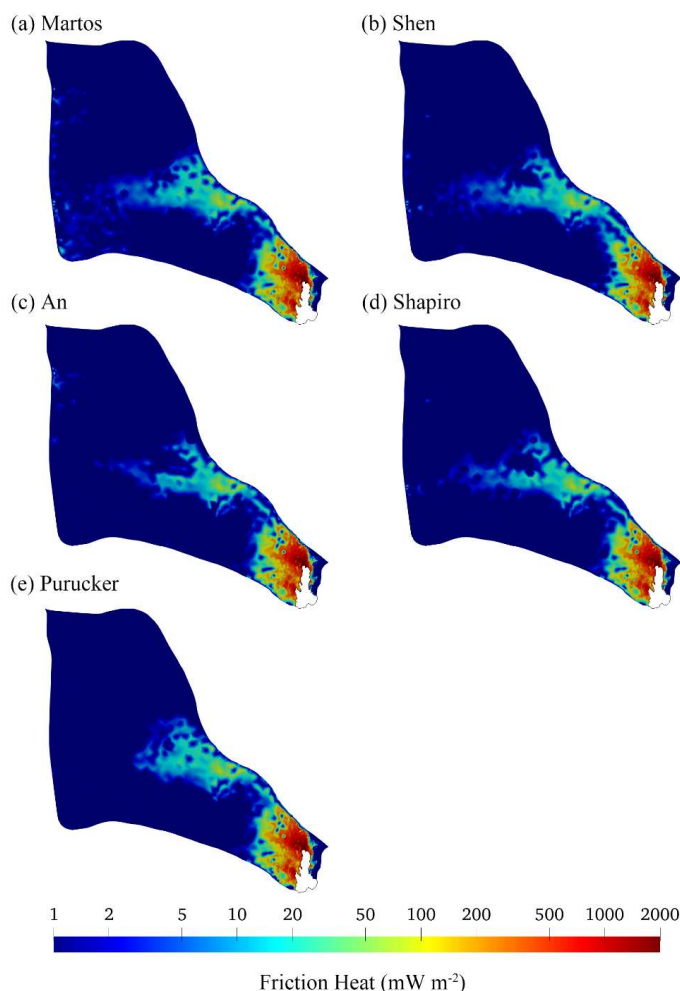

235

236 Fig. 6. Modelled basal friction heat.

237

238 The distribution of modeled basal friction heat is closely associated with that of  
239 modelled basal velocity. The patterns of basal friction heat with different GHFs are very  
240 similar in fast flow region, but have some differences in the middle of the domain (Fig.  
241 6) where modelled basal velocity ranges between 5-20  $\text{m yr}^{-1}$  (Fig. 4).

242

243 The modelled basal friction heat is close to 0 where the surface ice velocity is less than  
244 10  $\text{m yr}^{-1}$ , but ranges widely by 10-2000  $\text{mW m}^{-2}$  elsewhere. Basal friction heating  
245 larger than 100  $\text{mW m}^{-2}$  occurs where surface velocity is more than 50  $\text{m yr}^{-1}$  and basal  
246 velocity is higher than 10  $\text{m yr}^{-1}$  (Fig. 6; Fig. 4), and it is then the dominant heat source.

247

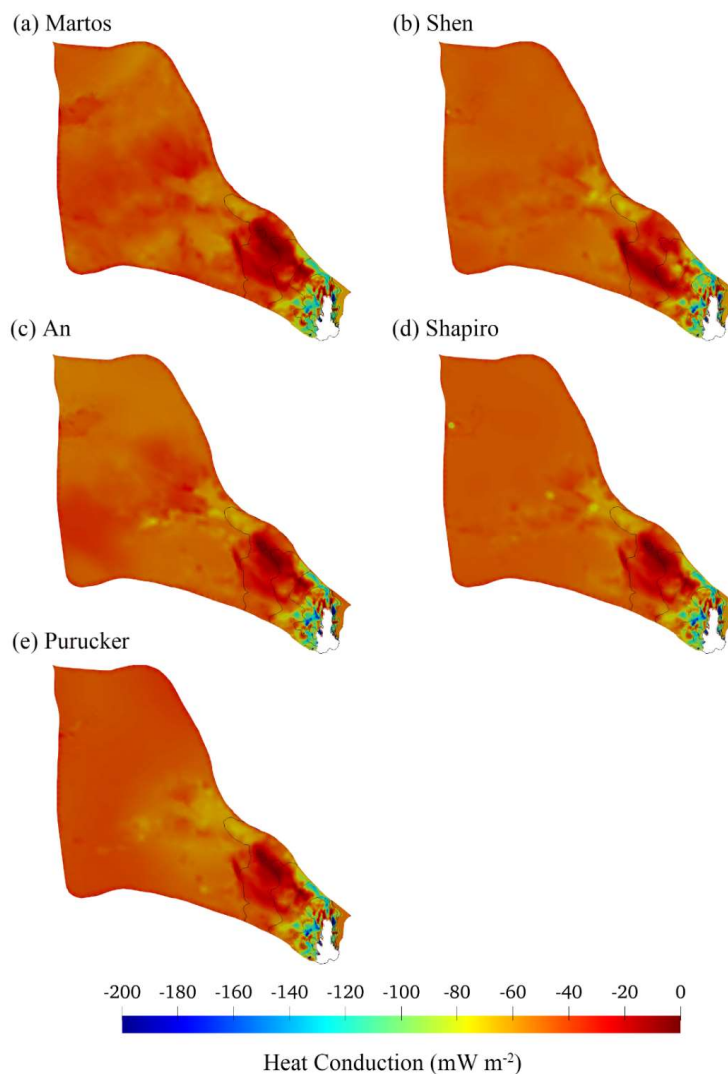

248

249 Fig. 7. Modelled heat change of basal ice by upward englacial heat conduction. The negative sign  
250 means that the upward englacial heat conduction causes heat loss from the basal ice as defined by  
251 the color bar with cooler colors representing more intense heat loss by conduction. (a) to (e)  
252 corresponding to the GHF (a) to (e) in Fig. 2. The black solid curves represent modelled surface  
253 speed contours of 30, 50, 100 and 200  $\text{m yr}^{-1}$ , as in Fig. 4.

254

255 Fig. 7 shows the modeled heat change of basal ice by upward englacial heat conduction  
256 in the five experiments. In the slow-flowing region where basal temperature is below  
257 the pressure melting point, the upward basal heat conduction equals the GHF (Fig. 5,  
258 Fig. 7). In the region where basal temperature reaches pressure melting point (Fig. 5)



259 with low basal velocity (Fig. 4c) and thick ice ( $\geq 2500$  m; Fig. 1c), the heat loss caused  
260 by upward basal heat conduction is  $< 30$  mW m<sup>-2</sup> in all experiments (Fig. 7), reflecting  
261 the development of a temperate basal layer that limits the basal thermal gradient. In the  
262 fast-flowing tributaries with high basal velocity (Fig. 4c) and ice thickness  $< 2000$  m,  
263 the heat loss caused by upward basal heat conduction can be very large, 100-200 mW  
264 m<sup>-2</sup> near the grounding line (Fig. 7).

265

#### 266 **4.4 Basal Melt Rate**

267 We calculate basal melt rate using the thermal balance equation (Eq 3). There are  
268 significant differences in the five experiments due to large variability in GHF (Fig. 8).  
269 The Martos et al. (2017) and then Shen et al. (2020) yield the largest areas with basal  
270 melting. The experiments using An et al. (2015), Shapiro and Ritzwoller (2004) and  
271 Purucker et al. (2013) yield similar total basal melting areas but have different spatial  
272 patterns.

273

274 In most of the warm based regions, the modeled basal melting rate is  $< 5$  mm yr<sup>-1</sup> (Fig.  
275 8) and basal friction heat is  $< 50$  mW m<sup>-2</sup> (Fig. 6). Basal melting rates  $> 5$  mm yr<sup>-1</sup> occur  
276 with surface velocities  $> 100$  m yr<sup>-1</sup> (Fig. 4, Fig. 8), where the basal friction heat is the  
277 dominant heat source. In particular, the modeled basal melting rate is 50-400 mm yr<sup>-1</sup>  
278 in the two fast flow tributaries feeding the ice shelf that have surface velocities  $> 200$   
279 m yr<sup>-1</sup>, and where the basal friction heat can reach 500-2000 mW m<sup>-2</sup> (Fig. 4, Fig. 6, Fig.  
280 8). This is consistent with the findings of Larour et al. (2012) and Kang et al. (2022),  
281 that the slow-flowing ice is more sensitive to GHF while the fast-flowing region is more  
282 sensitive to basal friction heat.

283

284 There is relatively high modelled basal melt rate (4-10 mm yr<sup>-1</sup>) localized at the central  
285 subglacial canyon (Fig. 8, Fig. 1c), which is captured by all five GHF experiments, and  
286 also consistent with the high values (0.5-1.0) of specularly content data there (Fig. 9).  
287 Dow et al. (2020) found that the specularly content is a useful proxy for both water  
288 depth and water pressure in regions of distributed water in subglacial canyons.

289

290 There is a location with modelled refreezing (negative melting rate) at the central  
291 subglacial canyon, near the observed subglacial lake, in all five GHF experiments (Fig.  
292 8). The value of specularly content there is low as 0-0.1 (Fig. 9), and freeze on is driven  
293 by the steep topography around the canyon.

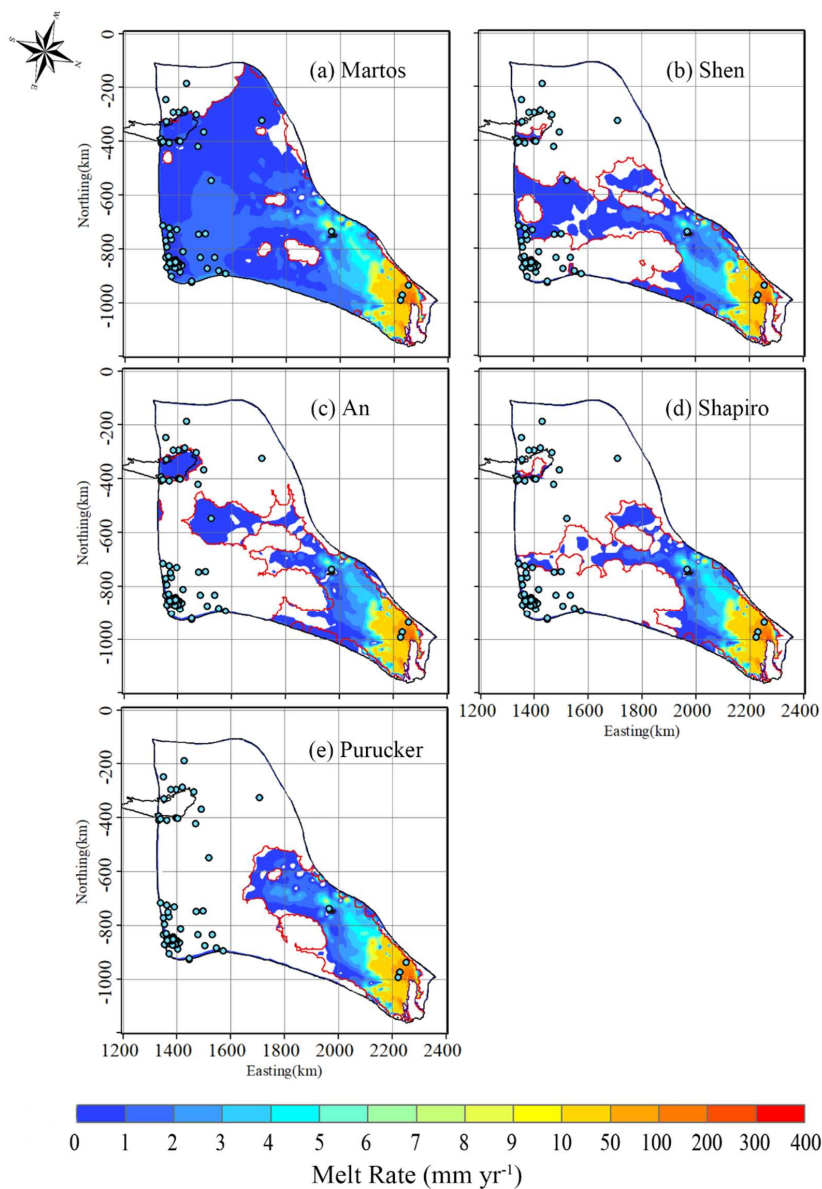

294

295 Fig. 8. Modelled basal melt rate, (a) to (e) correspond to the GHF (a) to (e) in Fig. 2. The ice bottom  
296 at pressure-melting point is surrounded by a red contour. The black curve denotes Lake Vostok.  
297 Stable subglacial lakes are shown as blue-green points with black circles. There is modelled basal  
298 refreezing at the central canyon painted in black.

299

#### 300 4.5 Evaluation of modelled results with 5 GHFs

301 We use the locations of the observed subglacial lakes and specularity content to

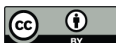

302 discriminate between modeled basal melting (Fig. 8). Ideally, we would like to have a  
303 modeled ice base that is cold and dry where subglacial lakes do not exist and the  
304 specularity content is low, and a modeled ice base that is at the melting point where  
305 lakes and high specularity content are observed. In other words, we would like to use  
306 the available data to form a two-sided constraint that can penalize the model for being  
307 both too warm and too cold. If we only have a one-sided constraint, then we would  
308 always end up concluding that either the warmest or the coldest GHF map is best,  
309 regardless of whether that map was a reasonable representation of the basal state.

310  
311 Observations of subglacial lakes are mostly a one-sided constraint on the basal thermal  
312 state. This is because lakes are only detectable if subglacial water accumulates in  
313 depressions that are deep compared to the radar wavelength and wide in comparison to  
314 the horizontal resolution of the radar system. Other forms of distributed hydrology,  
315 such as linked cavities or saturated subglacial sediments, do not produce the classic flat  
316 bright reflectors characteristic of subglacial lakes. Thus, the lack of observed subglacial  
317 lakes in a particular region cannot be taken as evidence that there is no subglacial water  
318 there. The mesh resolution of our model inland is about 20 km (Fig. 3). But 84% of the  
319 subglacial lakes have along-radar track lengths below 5 km, 94% are below 10 km, with  
320 only 5 lakes including Lake Vostok above 10 km (Fig. 9f). So the subglacial lakes may  
321 be too small for the ice model to resolve. Nonetheless, we compare our modeled basal  
322 thermal state with the observed locations of subglacial lakes. These comparisons show  
323 that all the experiments can capture all four subglacial lakes in the fast-flowing region  
324 (Fig. 8). But their performance in covering subglacial lakes in the slow-flowing region  
325 differ greatly.

326  
327 In addition to the subglacial lakes, we use specularity content to derive a two-sided  
328 constraint on basal thermal state. Specularity content is an inherently noisy measure, so  
329 it is smoothed to 1 km along track values, and furthermore it is not unambiguously an  
330 indicator of wet beds. For example, specularity content is low in the fast-flowing region  
331 (Fig. 9, Fig. 4), where there must be lubricating water at the bed. Similar specularity  
332 results were also seen by Schroeder et al. (2013) for Thwaites Glacier, where high  
333 specularity values are seen under the major tributaries and the upstream trunk, but  
334 significant lower values of specularity in the fast-flowing region. This counter-intuitive  
335 result may be due to distinct morphologies and radar scattering signatures between  
336 water distributed in widespread subglacial conduits and water concentrated in just a few  
337 subglacial channels. Because of this effect, we only use the specularity content outside  
338 the fast-flowing region (defined as surface speed  $>30 \text{ m a}^{-1}$ , Fig. 9).

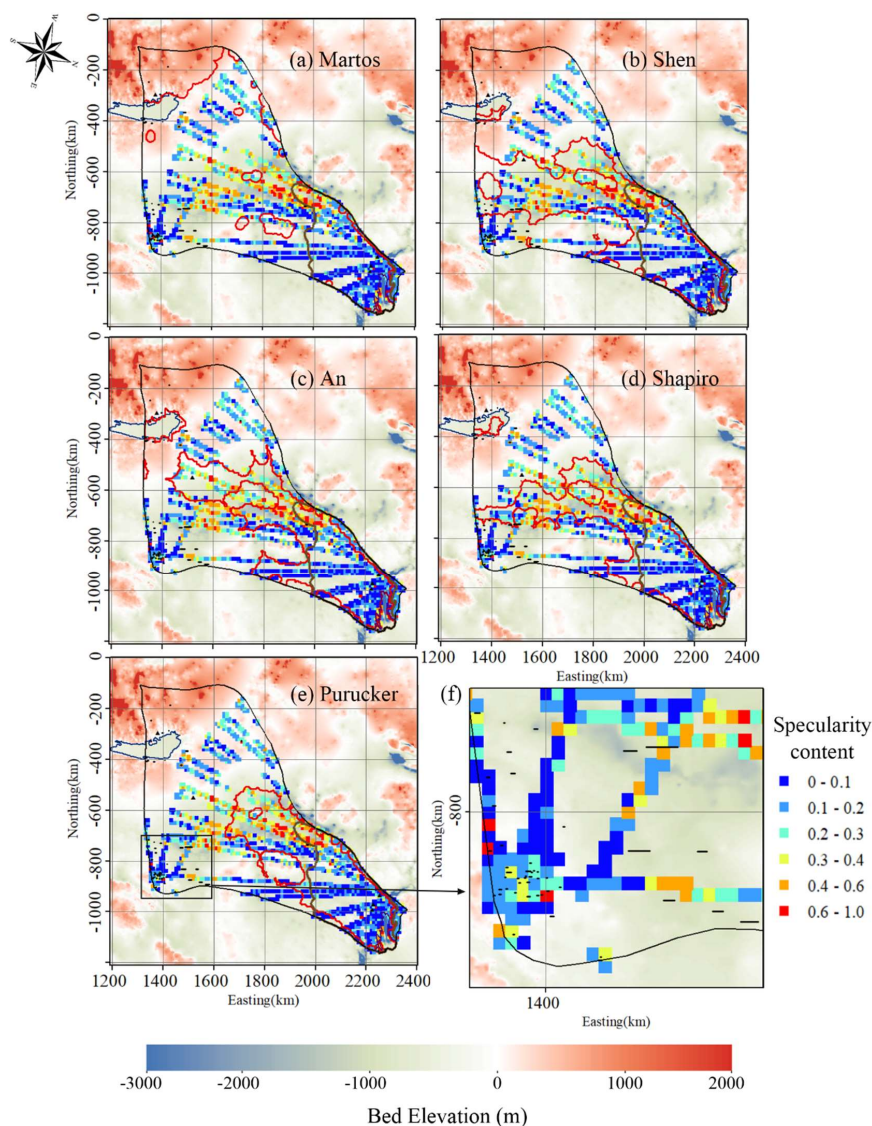

339  
340 Fig. 9. Locations of specularity content (colored points) derived from radar data collected by  
341 ICECAP (Dow et al., 2020) and interpolated to 10 km by 10 km grids under the background of  
342 bedrock elevation. Specularity content  $> 0.4$  indicates the likely presence of basal water. The ice  
343 bottom at pressure-melting point is surrounded by a red contour, (a) to (e) correspond to the five  
344 GHF maps (a) to (e) in Fig. 2. Lake Vostok is outlined by a blue curve. The brown curve is the  
345 contour of surface speed of  $30 \text{ m a}^{-1}$ . Subglacial lakes are shown at observed positions as a line  
346 segment of their length. Plot (f) is a zoom of the box in plot (e).  
347  
348 The specularity content data calculated from ICECAP survey lines suggests hundreds  
349 of locations with basal water (Dow et al., 2020). The default resolution of specularity



350 content along the flight lines is 1 km (Dow et al., 2020), which is smaller than our model  
351 resolution of 6-20 km in the slow flowing region. Water may accumulate in just a small  
352 fraction of the grid cell even if the majority of the cell is warm because of water flow.  
353 For comparability, with our simulation resolution we aggregated the specularity content  
354 data onto 10 km by 10 km windows (Fig. 9). The 10 km window is a somewhat arbitrary  
355 choice, but smaller windows (we tried 2 and 5 km) reduce the data available and noise  
356 becomes larger, while larger windows (we tried 15 and 20 km) restrict spatial resolution.  
357 We then take the upper fifth percentile of the specularity content,  $specularity_5$  of each  
358 window as a water indicator rather than its mean value to allow for localized water  
359 collection or unfavorable bed reflection geometry, while also excluding spurious signals  
360 in the noisy specularity data. Young et al. (2016) suggested that specularity larger than  
361 0.4 was an indicator of a warm bed. This is also consistent with the largest subglacial  
362 lake in the domain with length of 28 km having specularity content  $>0.4$  (Fig. 9f). There  
363 are also some smaller lakes (several km along-track lengths) with specularity content  
364 between 0.2 and 0.4, so a warm threshold of 0.4 would not capture these features. The  
365 cold threshold need not be the same as the warm bed one, and so we explored different  
366 values for cold thresholds of 0.2, 0.3, 0.4, but found that the 0.2 cold threshold provided  
367 best discrimination between models, and also maximizes the available data.

368  
369 To evaluate modelled basal conditions with specularity content, we define a warm hit  
370 rate as the ratio of the number of grid cells with modelled warm bed that have  
371  $specularity_5 > 0.4$  to the total number of grids with  $specularity_5 > 0.4$ . Similarly, cold  
372 hit rate is defined as the ratio of the number of grid cells with  $specularity_5 < 0.2$ .

373  
374 One simple measure of quality is just the average of warm hit rate and cold hit rate, but  
375 we also want an unbiased evaluation of GHF to have similar capabilities in capturing  
376 both warm bed and cold bed regions. Therefore, we define *imbalance* as

377 
$$imbalance = \frac{warm\ hit\ rate - cold\ hit\ rate}{warm\ hit\ rate + cold\ hit\ rate}$$

378 as it reflects the difference between warm hit rate and cold hit rate, and has a value  
379 between -1 and 1. The closer to zero *imbalance* is, the more confidence we have in the  
380 model result. The overall performance is estimated by averaged hit rate minus the  
381 absolute value of *imbalance*.

382  
383 The Martos GHF has the highest warm hit rate and the lowest cold hit rate since it has  
384 the largest modelled warm bed area. The averaged hit rates of modelled results with 5  
385 GHF are very close, with differences  $< 0.13$  (Table 3). The Shapiro, Purucker, then Shen  
386 have the highest averaged hit rate using all the values for threshold of cold bed, and the  
387 differences between their averaged hit rate  $< 0.04$ .

388  
389 Martos and Shen have positive *imbalance*, which means that their warm hit rate is  
390 higher than their cold hit rate. In contrast, An, Shapiro and Purucker have negative  
391 *imbalance*. Martos has the largest *imbalance* because its warm hit rate overwhelms its  
392 cold hit rate. The absolute *imbalance* of Shen is  $< 0.05$  with all three cold hit thresholds



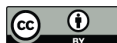

393 we used and always the smallest (Table 3) of the GHF. The Shapiro absolute *imbalance*  
394 the second smallest with all the cold hit thresholds. Therefore, Shen and Shapiro rank  
395 the top two according to *imbalance* between warm hit rate and cold hit rate.

396

397 Considering the overall performance by averaged hit rate minus the absolute value of  
398 *imbalance*, Shen is the best, Shapiro the second, Purucker the third, An the fourth and  
399 Martos the last (Table 3). The ranking is robust with all three cold hit thresholds.

400

401 Table 3. Warm hit rate, cold hit rate, averaged hit rate, imbalance and overall  
402 performance for the modelled results with 5 GHFs. The threshold of *specularity*<sub>5</sub> is  
403 taken as 0.4 for warm hit rate, and 0.2 for cold hit rate.

| GHF      | warm hit rate | cold hit rate | averaged hit rate | Imbalance | averaged hit rate – abs(imbalance) |
|----------|---------------|---------------|-------------------|-----------|------------------------------------|
| Martos   | 0.9560        | 0.1648        | 0.56              | 0.71      | -0.15                              |
| Shen     | 0.6588        | 0.6564        | 0.65              | 0.0018    | 0.65                               |
| An       | 0.4340        | 0.7652        | 0.60              | -0.28     | 0.32                               |
| Shapiro  | 0.5975        | 0.7822        | 0.69              | -0.13     | 0.56                               |
| Purucker | 0.5283        | 0.8201        | 0.67              | -0.22     | 0.45                               |

404

## 405 **5 Discussion**

406 Wright et al. (2012) modelled basal temperature of Totten Glacier using the Glimmer  
407 ice sheet model with a constant GHF of 54 mW m<sup>-2</sup>. Their modelled area of basal warm  
408 ice is between what we simulated using Martos et al. (2017) and Shen et al. (2020),  
409 covering most of the lakes and lake-like features but missing some near Lake Vostok.  
410 Dow et al. (2020) ran the Ice Sheet System Model (Larour et al., 2012) with a constant  
411 GHF of 55 mW m<sup>-2</sup>, producing a warm bed region slightly larger than we simulated  
412 using the Shen et al. (2020) GHF (which has a mean of 58 mW m<sup>-2</sup> in this region, Table  
413 2). Eisen et al. (2020) modeled the basal temperature of Antarctic ice sheet with the  
414 Parallel Ice Sheet Model using four different GHF datasets (Shapiro and Ritzwoller,  
415 2004; Fox Maule et al., 2005; An et al., 2015; Martos et al., 2017). The mean modelled  
416 basal temperature of the different GHFs appear close to our result using the Shen et al.  
417 (2020) GHF, with basal temperatures reaching the pressure melting point in the fast  
418 flow region and the central upstream region of Totten Glacier.

419

420 Kang et al. (2020) evaluated basal thermal conditions underneath the Lambert-Amery  
421 glacier system using six GHFs, and found that the two most recent GHF fields inverted  
422 from aerial geomagnetic observations and which have the highest GHF values,  
423 produced the largest warm-based area, and best matched the observed distribution of  
424 subglacial lakes. This might be expected as there was only a one-sided constraint used,  
425 and warm based models produced matches with more lakes.

426

427 Although the basal ice in fast-flowing regions is all at pressure melting point because  
428 basal friction heat dominates the heat balance, the modelled basal melt rate of the



429 grounded ice in fast-flowing regions exhibits large differences across-models. The  
430 modelled basal melt rate is associated with the modelled basal friction heat, which is a  
431 function of the modelled basal velocity and basal shear stress, the accuracy of which  
432 depends on the configuration and constraints of the ice sheet model used. Our modelled  
433 maximum basal melt rate on the grounded ice is  $0.4 \text{ m yr}^{-1}$  near the grounding line. This  
434 is close to the modelled maximum basal melt rate of  $0.34 \text{ m yr}^{-1}$  near the grounding line  
435 by Dow et al. (2020), where they calculated the basal melt rates as a function of  
436 combined GHF and frictional heating using the Ice Sheet System Model. We know of  
437 no observations of the basal melt rates of grounded ice in Totten Glacier.

438  
439 Modelled basal sliding speeds by Dow et al. (2020) range from  $0.06 \text{ m yr}^{-1}$  inland to  
440  $900 \text{ m yr}^{-1}$  at the grounding line, which is close to our result (Fig. 4). Dow et al (2020)  
441 simulate basal sliding generally where bedrock is below sea level, with an area close to  
442 our simulation with a basal sliding coefficient  $\beta_{old}$  and which is larger than ours using  
443 the improved basal sliding coefficient  $\beta_{new}$  (Eq 2) found by considering the basal  
444 temperature relative to pressure-melting point. The modelled basal sliding speed  
445 reaches a local maximum at the middle of the subglacial canyon system (Fig. 4), which  
446 leads to local maxima in basal friction and basal melt rate (Fig. 8), and is consistent  
447 with the high values of specularity (Fig. 9).

448  
449 To evaluate the simulation results, we compare the simulated basal melting area with  
450 the locations of the discovered subglacial lakes and specularity content derived from  
451 radar data collected by ICECAP (Dow et al., 2020). Specularity is a parameterization  
452 that estimates the along-track angularly narrow component of bed echo energy  
453 compared with the isotropic diffuse energy component (Schroeder et al., 2015).  
454 Specularity is determined by a set of ice/bed properties including the length, width and  
455 thickness of the water body, its conductivity, and the roughness of the ice/water  
456 interface. Off-nadir across-track reflectors may also produce glints creating noise in the  
457 specularity distribution. Hence, interpretation of specularity is ambiguous and  
458 dependent on the local bed morphology. This led us to experiment with a range of  
459 windows over which to aggregate the bed reflection energy, and various thresholds for  
460 estimating cold and warm beds. We were able to use the numerous subglacial lakes in  
461 the region as a guide to setting these parameters, bearing in mind that the observations  
462 of subglacial lakes are a one-sided constraint. If the modeled basal melting area misses  
463 the subglacial lake or high specularity content, the model is underestimating the basal  
464 temperature at that location. However, if the basal melting is simulated in areas without  
465 observed subglacial lakes, it is unclear if this is because the models overestimate the  
466 temperature in those areas, or if the water under the ice sheet has not been detected.  
467 Moreover, a hypersaline lake and various other water saturated environments seem to  
468 exist below cold ice beneath Devon Island ice cap in Canada (Rutishauser et al., 2022).  
469 In addition, relatively high electrical conductivity beds like water saturated clays can  
470 lead to false positives in radar detections of subglacial water bodies (Talalay et al.,  
471 2020).

472



473 Our evaluation using specularity content is a two-sided constraint and thus improves on  
474 observed subglacial lakes as a discriminating feature of cold and warm beds. [The](#)  
475 [experiment with Martos et al. \(2017\) GHF models the largest region of basal melt, and](#)  
476 [covers most observed subglacial lake locations.](#) However, it ranks worst in the  
477 evaluation using specularity content, because it cannot capture cold beds well.

478

## 479 **6 Conclusions**

480 In this study we diagnose the basal thermal state of Totten Glacier by coupling a forward  
481 model and an inverse model and using five different GHFs. By comparing modelled  
482 basal temperature distributions with metrics derived from specularity content data we  
483 evaluate the reliability of the five GHF data in this area.

484

485 We find there are significant differences in the spatial distributions of modelled  
486 temperate ice with different GHFs, and the differences are mainly concentrated in the  
487 slow ice flow regions. The modelled basal thermal state (frozen/melting) in the slow  
488 ice flow region is mainly determined by the heat balance between GHF and englacial  
489 upward heat conduction, and the basal melting rate is generally less than 5 mm yr<sup>-1</sup>.  
490 However, there is local maximum in modelled basal melt rate (4-10 mm yr<sup>-1</sup>) at the  
491 central subglacial canyon, which could be explained by the local high basal sliding  
492 velocity and frictional heat that are captured by all GHF experiments. This is consistent  
493 with the high values of specularity content data there.

494

495 The basal heat balance in the fast ice flow region is mainly determined by the basal  
496 frictional heat. The basal ice in the fast flow region is all at the melt point. The modeled  
497 basal melting rate is 50-400 mm yr<sup>-1</sup> in the two fast flow tributaries feeding the ice shelf  
498 with surface velocity greater than 200 m yr<sup>-1</sup>, where the basal friction heat is 500-2000  
499 mW m<sup>-2</sup>.

500

501 Our evaluation using specularity content as a two-sided constraint, gives quite different  
502 result than only using observed locations of subglacial lakes. Simulations with the  
503 Martos et al. (2017) GHF yields the largest region of basal melt, which covers most  
504 observed subglacial lake locations, however, its cold bed fit with specularity content is  
505 poor and shows huge imbalance in modelling warm bed and cold bed regions. Overall,  
506 Martos et al. (2017) GHF ranks last in the evaluation with specularity content. Shen et  
507 al. (2020) GHF yields the second largest area of basal melt and second best agreement  
508 with the locations of the subglacial lakes, and also scores well in modelling both warm  
509 and cold bed areas. Shen et al. (2020) GHF and Shapiro and Ritzwoller (2004) GHF  
510 rank the top two according to the evaluation with specularity content. The best-fit  
511 simulated result shows that most of the inland bed area is frozen. Only the upstream  
512 subglacial canyon inland reaches pressure-melting point, and modelled basal melting  
513 rate there is 0-10 mm yr<sup>-1</sup>.

514

## 515 **Data availability**

516 MEaSURES BedMachine Antarctica, version 2, is available at



517 <https://doi.org/10.5067/E1QL9HFQ7A8M> (Morlighem, 2020). MEaSURES InSAR-  
518 based Antarctic ice velocity Map, version 2, is available at  
519 <https://doi.org/10.5067/D7GK8F5J8M8R> (Rignot et al., 2017). MEaSURES Antarctic  
520 Boundaries for IPY 2007–2009 from Satellite Radar, version 2 is available at  
521 <https://doi.org/10.5067/AXE4121732AD> (Mouginot et al., 2017). The subglacial lake  
522 dataset is available at <https://doi.org/10.1038/s43017-021-00246-9> (Livingstone et al.,  
523 2022). The specularity content dataset <https://doi.org/10.5281/zenodo.3525474> (Dow  
524 et al., 2020). ALBMAP v1 and the GHF dataset of Shapiro and Ritzwoller (2004) are  
525 available at <https://doi.org/10.1594/PANGAEA.734145> (LeBrocq et al., 2010b). The  
526 GHF dataset of An et al. (2015) is available at  
527 <http://www.seismolab.org/model/antarctica/lithosphere/AN1-HF.tar.gz> (last access: 11  
528 April 2023). The GHF dataset of Shen et al. (2020) is available at  
529 <https://sites.google.com/view/weisen/research-products?authuser=0> (last access: 11  
530 April 2023). The GHF dataset of Martos (2017) is available at  
531 <https://doi.org/10.1594/PANGAEA.882503>. The GHF dataset of Purucker (2012) is  
532 available at [http://websrv.cs.umt.edu/isis/index.php/Antarctica\\_Basal\\_Heat\\_Flux](http://websrv.cs.umt.edu/isis/index.php/Antarctica_Basal_Heat_Flux) (last  
533 access: 11 April 2023). The modelled basal temperature, basal melt rate and the upper  
534 fifth percentile of the specularity content in this paper will be available at  
535 <https://doi.org/10.5281/zenodo.7825456>.

536

#### 537 **Author contributions.**

538 LZ and JCM conceived the study. LZ, MW, and JCM designed the methodology. YH,  
539 LZ, and YM carried out the simulations and produced the estimates and figures. LZ  
540 wrote the original draft, and all the authors revised the paper.

541

#### 542 **Competing interests.**

543 The authors declare no conflict of interest.

544

#### 545 **Acknowledgments**

546 This work was supported by the National Natural Science Foundation of China (No.  
547 41941006), National Key Research and Development Program of China  
548 (2021YFB3900105), State Key Laboratory of Earth Surface Processes and Resource  
549 Ecology (2022-ZD-05) and Finnish Academy COLD Consortium (No. 322430).

550

#### 551 **References**

- 552 Adusumilli, S., Fricker, H. A., Medley, B., Padman, L., and Siegfried, M. R.:  
553 Interannual variations in meltwater input to the Southern Ocean from Antarctic ice  
554 shelves, *Nat. Geosci.*, 13, 616–620, <https://doi.org/10.1038/s41561-020-0616-z>,  
555 2020.
- 556 An, M., Wiens, D. A., Zhao, Y., Feng, M., Nyblade, A., Kanao, M., Li, Y., Maggi, A.,  
557 and L ev eque, J.: Temperature, lithosphere-asthenosphere boundary, and heat flux  
558 beneath the Antarctic Plate inferred from seismic velocities, *J. Geophys. Res. Solid*  
559 *Earth*, 120, 8720–8742, <https://doi.org/10.1002/2015JB011917>, 2015.
- 560 Bell, R. E., Studinger, M., Shuman, C. A., Fahnestock, M. A., and Joughin, I.: Large



- 561 subglacial lakes in East Antarctica at the onset of fast-flowing ice streams, *Nature*,  
562 445, 904–907, <https://doi.org/10.1038/nature05554>, 2007.
- 563 Chen, J. L., Wilson, C. R., Blankenship, D., and Tapley, B. D.: Accelerated Antarctic  
564 ice loss from satellite gravity measurements, *Nature Geosci*, 2, 859–862,  
565 <https://doi.org/10.1038/ngeo694>, 2009.
- 566 Comiso, J. C.: Variability and Trends in Antarctic Surface Temperatures from In Situ  
567 and Satellite Infrared Measurements, *J. Climate*, 13, 1674–1696,  
568 [https://doi.org/10.1175/1520-0442\(2000\)013<1674:VATIAS>2.0.CO;2](https://doi.org/10.1175/1520-0442(2000)013<1674:VATIAS>2.0.CO;2), 2000.
- 569 Cuffey, K. M., and Paterson, W. S. B.: *The physics of glaciers*, fourth edition, Elsevier,  
570 Burlington, 2010.
- 571 Dow, C. F., McCormack, F. S., Young, D. A., Greenbaum, J. S., Roberts, J. L., and  
572 Blankenship, D. D.: Totten Glacier subglacial hydrology determined from  
573 geophysics and modeling, *Earth and Planetary Science Letters*, 531, 115961,  
574 <https://doi.org/10.1016/j.epsl.2019.115961>, 2020.
- 575 Dow, Christine. Aurora Subglacial Basin GlADs inputs, outputs and geophysical data  
576 [data set]. Zenodo. <https://doi.org/10.5281/zenodo.3525474>, 2019
- 577 Eisen, O., Winter, A., Steinhage, D., Kleiner, T., and Humbert, A.: Basal roughness of  
578 the East Antarctic Ice Sheet in relation to flow speed and basal thermal state, *Ann.*  
579 *Glaciol.*, 61, 162–175, <https://doi.org/10.1017/aog.2020.47>, 2020.
- 580 Fricker, H. A., Siegfried, M. R., Carter, S. P., and Scambos, T. A.: A decade of progress  
581 in observing and modelling Antarctic subglacial water systems, *Phil. Trans. R. Soc.*  
582 *A.*, 374, 20140294, <https://doi.org/10.1098/rsta.2014.0294>, 2016.
- 583 Gagliardini, O., Zwinger, T., Gillet-Chaulet, F., Durand, G., Favier, L., de Fleurian, B.,  
584 Greve, R., Malinen, M., Martín, C., Råback, P., Ruokolainen, J., Sacchettini, M.,  
585 Schäfer, M., Seddik, H., and Thies, J.: Capabilities and performance of Elmer/Ice,  
586 a new-generation ice sheet model, *Geosci. Model Dev.*, 6, 1299–1318,  
587 <https://doi.org/10.5194/gmd-6-1299-2013>, 2013.
- 588 Geuzaine, C. and Remacle, J.-F.: Gmsh: A 3-D finite element mesh generator with built-  
589 in pre- and post-processing facilities: THE GMSH PAPER, *Int. J. Numer. Meth.*  
590 *Engng.*, 79, 1309–1331, <https://doi.org/10.1002/nme.2579>, 2009.
- 591 Gillet-Chaulet, F., Gagliardini, O., Seddik, H., Nodet, M., Durand, G., Ritz, C., Zwinger,  
592 T., Greve, R., and Vaughan, D. G.: Greenland ice sheet contribution to sea-level  
593 rise from a new-generation ice-sheet model, *The Cryosphere*, 6, 1561–1576,  
594 <https://doi.org/10.5194/tc-6-1561-2012>, 2012.
- 595 Greve R, Blatter H, *Dynamics of Ice Sheets and Glaciers*, Springer, 2009.
- 596 Gudlaugsson, E., Humbert, A., Andreassen, K., Clason, C. C., Kleiner, T., and Beyer,  
597 S.: Eurasian ice-sheet dynamics and sensitivity to subglacial hydrology, *J. Glaciol.*,  
598 63, 556–564, <https://doi.org/10.1017/jog.2017.21>, 2017.
- 599 Hansen, I. and Greve, R.: Polythermal modelling of steady states of the Antarctic ice  
600 sheet in comparison with the real world, n.d.
- 601 Kang, H., Zhao, L., Wolovick, M., and Moore, J. C.: Evaluation of six geothermal heat  
602 flux maps for the Antarctic Lambert–Amery glacial system, *The Cryosphere*, 16,  
603 3619–3633, <https://doi.org/10.5194/tc-16-3619-2022>, 2022.
- 604 Larour, E., Seroussi, H., Morlighem, M., and Rignot, E.: Continental scale, high order,



- 605 high spatial resolution, ice sheet modeling using the Ice Sheet System Model  
606 (ISSM): ICE SHEET SYSTEM MODEL, *J. Geophys. Res.*, 117, n/a-n/a,  
607 <https://doi.org/10.1029/2011JF002140>, 2012a.
- 608 Larour, E., Morlighem, M., Seroussi, H., Schiermeier, J., and Rignot, E.: Ice flow  
609 sensitivity to geothermal heat flux of Pine Island Glacier, Antarctica: ICE FLOW  
610 SENSITIVITY TO GEOTHERMAL HEAT, *J. Geophys. Res.*, 117, n/a-n/a,  
611 <https://doi.org/10.1029/2012JF002371>, 2012b.
- 612 Le Brocq, A. M., Payne, A. J., and Vieli, A.: An improved Antarctic dataset for high  
613 resolution numerical ice sheet models (ALBMAP v1), *Earth Syst. Sci. Data*, 2,  
614 247–260, <https://doi.org/10.5194/essd-2-247-2010>, 2010.
- 615 Le Brocq, A. M., Ross, N., Griggs, J. A., Bingham, R. G., Corr, H. F. J., Ferraccioli, F.,  
616 Jenkins, A., Jordan, T. A., Payne, A. J., Rippin, D. M., and Siegert, M. J.: Evidence  
617 from ice shelves for channelized meltwater flow beneath the Antarctic Ice Sheet,  
618 *Nature Geosci.*, 6, 945–948, <https://doi.org/10.1038/ngeo1977>, 2013.
- 619 Li, X., Rignot, E., Mouginot, J., and Scheuchl, B.: Ice flow dynamics and mass loss of  
620 Totten Glacier, East Antarctica, from 1989 to 2015: TOTTEN GLACIER:  
621 VELOCITY AND MASS CHANGE, *Geophys. Res. Lett.*, 43, 6366–6373,  
622 <https://doi.org/10.1002/2016GL069173>, 2016.
- 623 Livingstone, S. J., Utting, D. J., Ruffell, A., Clark, C. D., Pawley, S., Atkinson, N., and  
624 Fowler, A. C.: Discovery of relict subglacial lakes and their geometry and  
625 mechanism of drainage, *Nat Commun.*, 7, ncomms11767,  
626 <https://doi.org/10.1038/ncomms11767>, 2016.
- 627 Livingstone, S. J., Li, Y., Rutishauser, A., Sanderson, R. J., Winter, K., Mikucki, J. A.,  
628 Björnsson, H., Bowling, J. S., Chu, W., Dow, C. F., Fricker, H. A., McMillan, M.,  
629 Ng, F. S. L., Ross, N., Siegert, M. J., Siegfried, M., and Sole, A. J.: Subglacial  
630 lakes and their changing role in a warming climate, *Nat Rev Earth Environ.*, 3,  
631 106–124, <https://doi.org/10.1038/s43017-021-00246-9>, 2022.
- 632 Martos, Y. M., Catalán, M., Jordan, T. A., Golynsky, A., Golynsky, D., Eagles, G., and  
633 Vaughan, D. G.: Heat Flux Distribution of Antarctica Unveiled, *Geophys. Res.*  
634 *Lett.*, 44, 11,417–11,426, <https://doi.org/10.1002/2017GL075609>, 2017.
- 635 Maule, C. F., Purucker, M. E., Olsen, N., and Mosegaard, K.: Heat Flux Anomalies in  
636 Antarctica Revealed by Satellite Magnetic Data, *Science*, 309, 464–467,  
637 <https://doi.org/10.1126/science.1106888>, 2005.
- 638 Morlighem, M., Rignot, E., Seroussi, H., Larour, E., Ben Dhia, H., and Aubry, D.:  
639 Spatial patterns of basal drag inferred using control methods from a full-Stokes  
640 and simpler models for Pine Island Glacier, West Antarctica: SPATIAL  
641 PATTERNS OF BASAL DRAG, *Geophys. Res. Lett.*, 37, n/a-n/a,  
642 <https://doi.org/10.1029/2010GL043853>, 2010.
- 643 Mouginot, J., Scheuchl, B., and Rignot, E.: MEaSURES Antarctic Boundaries for IPY  
644 2007-2009 from Satellite Radar, Version 2, National Snow and Ice Data Center,  
645 10, <https://doi.org/doi.org/10.5067/AXE4121732AD>, 2017.
- 646 Pattyn, F.: Antarctic subglacial conditions inferred from a hybrid ice sheet/ice stream  
647 model, *Earth and Planetary Science Letters*, 295, 451–461,  
648 <https://doi.org/10.1016/j.epsl.2010.04.025>, 2010.



- 649 Pittard, M. L., Roberts, J. L., Galton-Fenzi, B. K., and Watson, C. S.: Sensitivity of the  
650 Lambert-Amery glacial system to geothermal heat flux, *Ann. Glaciol.*, 57, 56–68,  
651 <https://doi.org/10.1017/aog.2016.26>, 2016.
- 652 Pollack, H. N., Hurter, S. J., and Johnson, J. R.: Heat flow from the Earth’s interior:  
653 Analysis of the global data set, *Rev. Geophys.*, 31, 267,  
654 <https://doi.org/10.1029/93RG01249>, 1993.
- 655 Pritchard, H. D., Arthern, R. J., Vaughan, D. G., and Edwards, L. A.: Extensive dynamic  
656 thinning on the margins of the Greenland and Antarctic ice sheets, *Nature*, 461,  
657 971–975, <https://doi.org/10.1038/nature08471>, 2009.
- 658 Purucker, M.: Geothermal heat flux data set based on low resolution observation  
659 collected by the CHAMP satellite between 2000 and 2010, and produced from  
660 the MF-6 model following the technique described in Fox Maule et al. (2005),  
661 Inter-active System for Ice sheet Simulation [data set],  
662 [http://websrv.cs.umt.edu/isis/index.php/Antarctica\\_Basal\\_Heat\\_Flux](http://websrv.cs.umt.edu/isis/index.php/Antarctica_Basal_Heat_Flux) (last access:  
663 5 August 2022), 2012.
- 664 Roberts, J., Galton-Fenzi, B. K., Paolo, F. S., Donnelly, C., Gwyther, D. E., Padman, L.,  
665 Young, D., Warner, R., Greenbaum, J., Fricker, H. A., Payne, A. J., Cornford, S.,  
666 Le Brocq, A., van Ommen, T., Blankenship, D., and Siegert, M. J.: Ocean forced  
667 variability of Totten Glacier mass loss, *SP*, 461, 175–186,  
668 <https://doi.org/10.1144/SP461.6>, 2018.
- 669 Rutishauser, A., Blankenship, D. D., Young, D. A., Wolfenbarger, N. S., Beem, L. H.,  
670 Skidmore, M. L., Dubnick, A., and Criscitiello, A. S.: Radar sounding survey over  
671 Devon Ice Cap indicates the potential for a diverse hypersaline subglacial  
672 hydrological environment, *The Cryosphere*, 16, 379–395,  
673 <https://doi.org/10.5194/tc-16-379-2022>, 2022.
- 674 Schroeder, D. M., Blankenship, D. D., and Young, D. A.: Evidence for a water system  
675 transition beneath Thwaites Glacier, West Antarctica, *Proc. Natl. Acad. Sci. U.S.A.*,  
676 110, 12225–12228, <https://doi.org/10.1073/pnas.1302828110>, 2013.
- 677 Schroeder, D. M., Blankenship, D. D., Raney, R. K., and Grima, C.: Estimating  
678 Subglacial Water Geometry Using Radar Bed Echo Specularity: Application to  
679 Thwaites Glacier, West Antarctica, *IEEE Geosci. Remote Sensing Lett.*, 12, 443–  
680 447, <https://doi.org/10.1109/LGRS.2014.2337878>, 2015.
- 681 Shapiro, N.: Inferring surface heat flux distributions guided by a global seismic model:  
682 particular application to Antarctica, *Earth and Planetary Science Letters*, 223, 213–  
683 224, <https://doi.org/10.1016/j.epsl.2004.04.011>, 2004.
- 684 Shen, W., Wiens, D. A., Lloyd, A. J., and Nyblade, A. A.: A Geothermal Heat Flux Map  
685 of Antarctica Empirically Constrained by Seismic Structure, *Geophysical*  
686 *Research Letters*, 47, <https://doi.org/10.1029/2020GL086955>, 2020.
- 687 Stearns, L. A., Smith, B. E., and Hamilton, G. S.: Increased flow speed on a large East  
688 Antarctic outlet glacier caused by subglacial floods, *Nature Geosci.*, 1, 827–831,  
689 <https://doi.org/10.1038/ngeo356>, 2008.
- 690 Studinger, M., Bell, R. E., Kerner, G. D., Tikku, A. A., Holt, J. W., Morse, D. L., Richter,  
691 T. G., Kempf, S. D., Peters, M. E., Blankenship, D. D., Sweeney, R. E., and  
692 Rystrom, V. L.: Ice cover, landscape setting, and geological framework of Lake



- 693 Vostok, East Antarctica, *Earth and Planetary Science Letters*, 205, 195–210,  
694 [https://doi.org/10.1016/S0012-821X\(02\)01041-5](https://doi.org/10.1016/S0012-821X(02)01041-5), 2003.
- 695 Talalay, P., Li, Y., Augustin, L., Clow, G. D., Hong, J., Lefebvre, E., Markov, A.,  
696 Motoyama, H., and Ritz, C.: Geothermal heat flux from measured temperature  
697 profiles in deep ice boreholes in Antarctica, *The Cryosphere*, 14, 4021–4037,  
698 <https://doi.org/10.5194/tc-14-4021-2020>, 2020.
- 699 Van Liefferinge, B. and Pattyn, F.: Using ice-flow models to evaluate potential sites of  
700 million year-old ice in Antarctica, *Clim. Past*, 9, 2335–2345,  
701 <https://doi.org/10.5194/cp-9-2335-2013>, 2013.
- 702 Van Liefferinge, B., Pattyn, F., Cavitte, M. G. P., Karlsson, N. B., Young, D. A., Sutter,  
703 J., and Eisen, O.: Promising Oldest Ice sites in East Antarctica based on  
704 thermodynamical modelling, *The Cryosphere*, 12, 2773–2787,  
705 <https://doi.org/10.5194/tc-12-2773-2018>, 2018.
- 706 Wolovick, M. J., Moore, J. C., and Zhao, L.: Joint Inversion for Surface Accumulation  
707 Rate and Geothermal Heat Flow From Ice-Penetrating Radar Observations at  
708 Dome A, East Antarctica. Part I: Model Description, Data Constraints, and  
709 Inversion Results, *JGR Earth Surface*, 126, <https://doi.org/10.1029/2020JF005937>,  
710 2021a.
- 711 Wolovick, M. J., Moore, J. C., and Zhao, L.: Joint Inversion for Surface Accumulation  
712 Rate and Geothermal Heat Flow From Ice-Penetrating Radar Observations at  
713 Dome A, East Antarctica. Part II: Ice Sheet State and Geophysical Analysis, *JGR*  
714 *Earth Surface*, 126, <https://doi.org/10.1029/2020JF005936>, 2021b.
- 715 Wright, A. and Siegert, M.: A fourth inventory of Antarctic subglacial lakes, *Antarctic*  
716 *Science*, 24, 659–664, <https://doi.org/10.1017/S095410201200048X>, 2012.
- 717 Wright, A. P., Young, D. A., Roberts, J. L., Schroeder, D. M., Bamber, J. L., Dowdeswell,  
718 J. A., Young, N. W., Le Brocq, A. M., Warner, R. C., Payne, A. J., Blankenship, D.  
719 D., van Ommen, T. D., and Siegert, M. J.: Evidence of a hydrological connection  
720 between the ice divide and ice sheet margin in the Aurora Subglacial Basin, East  
721 Antarctica, *J. Geophys. Res.*, 117, 2011JF002066,  
722 <https://doi.org/10.1029/2011JF002066>, 2012.
- 723 Young, D. A., Schroeder, D. M., Blankenship, D. D., Kempf, S. D., and Quartini, E.:  
724 The distribution of basal water between Antarctic subglacial lakes from radar  
725 sounding, *Phil. Trans. R. Soc. A.*, 374, 20140297,  
726 <https://doi.org/10.1098/rsta.2014.0297>, 2016.
- 727 Zhao, C., Gladstone, R. M., Warner, R. C., King, M. A., Zwinger, T., and Morlighem,  
728 M.: Basal friction of Fleming Glacier, Antarctica – Part 1: Sensitivity of inversion  
729 to temperature and bedrock uncertainty, *The Cryosphere*, 12, 2637–2652,  
730 <https://doi.org/10.5194/tc-12-2637-2018>, 2018.

731
